# Supplementary material
Source: PubMed Central journal article supplement (PMC9588547)
Supplement: NIHMS1821598-supplement-supinfo.pdf [file NIHMS1821598-supplement-supinfo.pdf]

## COVID-19 Outcomes in Children, Adolescents and Young Adults with Cancer

Rebecca S Parker, Justin Le, Andrew Doan, Paibel Aguayo-Hiraldo, Pia S Pannaraj, Teresa Rushing, Jemily Malvar, Maurice R O’Gorman, Jennifer Dien Bard, Chintan Parekh

Table of Contents:

Table S1 (Page 2)

Table S2 (available as separate Excel file)

Table S3 (Page 3)

Table S4 (Page 4)

Table S5 (Page 5)

Fig. S1 (Page 6)

Fig. S2 (Page 7)

Table S1. WHO COVID-19 severity classification based severity categorization used in the study.

| Severity         | Definition                                                                                                                                                                                                                                                                                                                         |
|------------------|------------------------------------------------------------------------------------------------------------------------------------------------------------------------------------------------------------------------------------------------------------------------------------------------------------------------------------|
| Mild Disease     | No evidence of pneumonia                                                                                                                                                                                                                                                                                                           |
| Moderate Disease | Non severe pneumonia: pneumonia (difficulty breathing, tachypnea, hypoxia <sup>a</sup> , or radiological evidence of pneumonia) without signs of severe pneumonia.                                                                                                                                                                 |
| Severe Disease   | Severe pneumonia: clinically evident pneumonia with at least one of the following:<br>1) oxygen saturation <90% on room air<br>2) severe respiratory distress (severe retractions or grunting)<br>3) Respiratory rate >30/min for adolescents and adults<br>4) Lethargy, unconsciousness or inability to drink in case of children |
| Critical Disease | Cases requiring life-sustaining treatment (non-invasive ventilation <sup>b</sup> , invasive ventilation, or vasopressors <sup>c</sup> ) for acute respiratory distress syndrome (ARDS), septic shock, or multi-system Inflammatory syndrome of children <sup>d</sup> .                                                             |

<sup>a</sup>Hypoxia: oxygen saturation <93% on room air

<sup>b</sup>Non-invasive ventilation: continuous positive airway pressure (CPAP) or bilevel positive airway pressure (BIPAP)

<sup>c</sup>Invasive ventilation: Intubation and mechanical ventilation

<sup>d</sup>Multisystem Inflammatory Syndrome of Childhood defined as age <20 years with fever for more than 3 days and two or more of the following (a-e):

a) rash or bilateral non-purulent conjunctivitis or inflammation of mouth, hands or feet

b) hypotension

c) cardiac dysfunction, pericarditis, valvulitis, or coronary vascular abnormalities;

d) evidence of coagulopathy excluding coagulopathy due to asparaginase

e) diarrhoea, vomiting, or abdominal pain

**and** laboratory evidence of hyperinflammation (high ESR or C-reactive protein)

**and** no non-COVID etiology for inflammation

Table S3. Details about patients who underwent multiple COVID-19 related hospitalizations

| Subject ID | Age | Diagnosis       | Anti-Cancer Therapy                                                   | Hospitalizations | Hospitalization Indication                                                                                                                           | COVID Disease Severity                                | COVID treatment                               |
|------------|-----|-----------------|-----------------------------------------------------------------------|------------------|------------------------------------------------------------------------------------------------------------------------------------------------------|-------------------------------------------------------|-----------------------------------------------|
| 3          | 21  | ALL             | CAR-T                                                                 | 6                | 1.Fever, hypoxemia<br>2.Fever, respiratory distress<br>3. Hypotension<br>4.Fever, pneumonia<br>5. Fever, pneumonia<br>6. Fever, respiratory distress | Critical                                              | Remdesivir, convalescent plasma, azithromycin |
| 20         | 3   | ALL             | Chemotherapy-Delayed Intensification                                  | 3                | 1. Fever, dehydration<br>2. Fever, hypoxemia<br>3. Fever, tachycardia                                                                                | Mild for first admission, severe for second admission | Remdesivir                                    |
| 32         | 16  | Medulloblastoma | Chemotherapy discontinued two months prior due to disease progression | 2                | 1. Dehydration<br>2. Dehydration                                                                                                                     | Mild                                                  | IV fluids, No specific anti-COVID treatment   |
| 59         | 12  | ALL             | Chemotherapy-Maintenance                                              | 2                | 1. Tachycardia<br>2. Chest pain, tachycardia                                                                                                         | Mild                                                  | IV fluids, No specific anti-COVID treatment   |

\*ID 32: No disease progression between two hospitalizations

Table S4. Details about patients with COVID-19 infection at the time of cancer diagnosis.

| Subject ID | Age | Diagnosis        | Chemo Modification/Delay                           | Hospitalization         | COVID Severity | COVID treatment                               | Comment                                                 |
|------------|-----|------------------|----------------------------------------------------|-------------------------|----------------|-----------------------------------------------|---------------------------------------------------------|
| 23         | 12  | Osteosarcoma     | No                                                 | No                      | mild           |                                               |                                                         |
| 37         | 8   | AML              | No-- tolerated FLAG-IDA                            | Yes, COVID related      | moderate       | Remdesivir<br>steroids                        | EOI MRD negative                                        |
| 53         | 13  | AML              | Yes, low dose cytarabine x13 days; delayed 15 days | Yes, COVID related      | critical       | Remdesivir<br>steroids<br>convalescent plasma | Acute respiratory failure, intubation. EOI MRD negative |
| 54         | 13  | Osteosarcoma     | No                                                 | Yes, unrelated to COVID | mild           |                                               |                                                         |
| 58         | 3   | ALL              | No                                                 | Yes, COVID related      | mild           |                                               | EOI MRD negative                                        |
| 60         | 10  | Burkitt Lymphoma | No, tolerated COP prephase                         | Yes, unrelated to COVID | mild           |                                               |                                                         |
| 66         | 5   | ALL              | Yes, 5 days                                        | Yes, unrelated to COVID | mild           |                                               | EOI MRD negative                                        |
| 77         | 1   | Retinoblastoma   | No                                                 | No                      | mild           |                                               |                                                         |

EOI MRD: end of induction minimal residual diseases

Table S5. Associations between baseline characteristics and cohort (cancer or normal).

| <b>Variables</b>               |                  | <b>Cancer<br/>N=87</b> | <b>Normal<br/>N=87</b> | <b>p value</b> |
|--------------------------------|------------------|------------------------|------------------------|----------------|
| <b>Age (years)<sup>a</sup></b> |                  |                        |                        |                |
|                                | ≥15 years        | 29                     | 19                     | 0.13           |
|                                | <15 years        | 58                     | 68                     |                |
| <b>Sex</b>                     |                  |                        |                        |                |
|                                | Male             | 48                     | 40                     | 0.29           |
|                                | Female           | 39                     | 47                     |                |
| <b>Ethnicity</b>               |                  |                        |                        |                |
|                                | Hispanic         | 64                     | 62                     |                |
|                                | Non-Hispanic     | 23                     | 25                     |                |
| <b>Time period</b>             |                  |                        |                        |                |
|                                | Before 12/1/2020 | 38                     | 39                     |                |
|                                | After 11/30/2020 | 49                     | 48                     |                |

Time period refers to when COVID-19 infection was diagnosed.

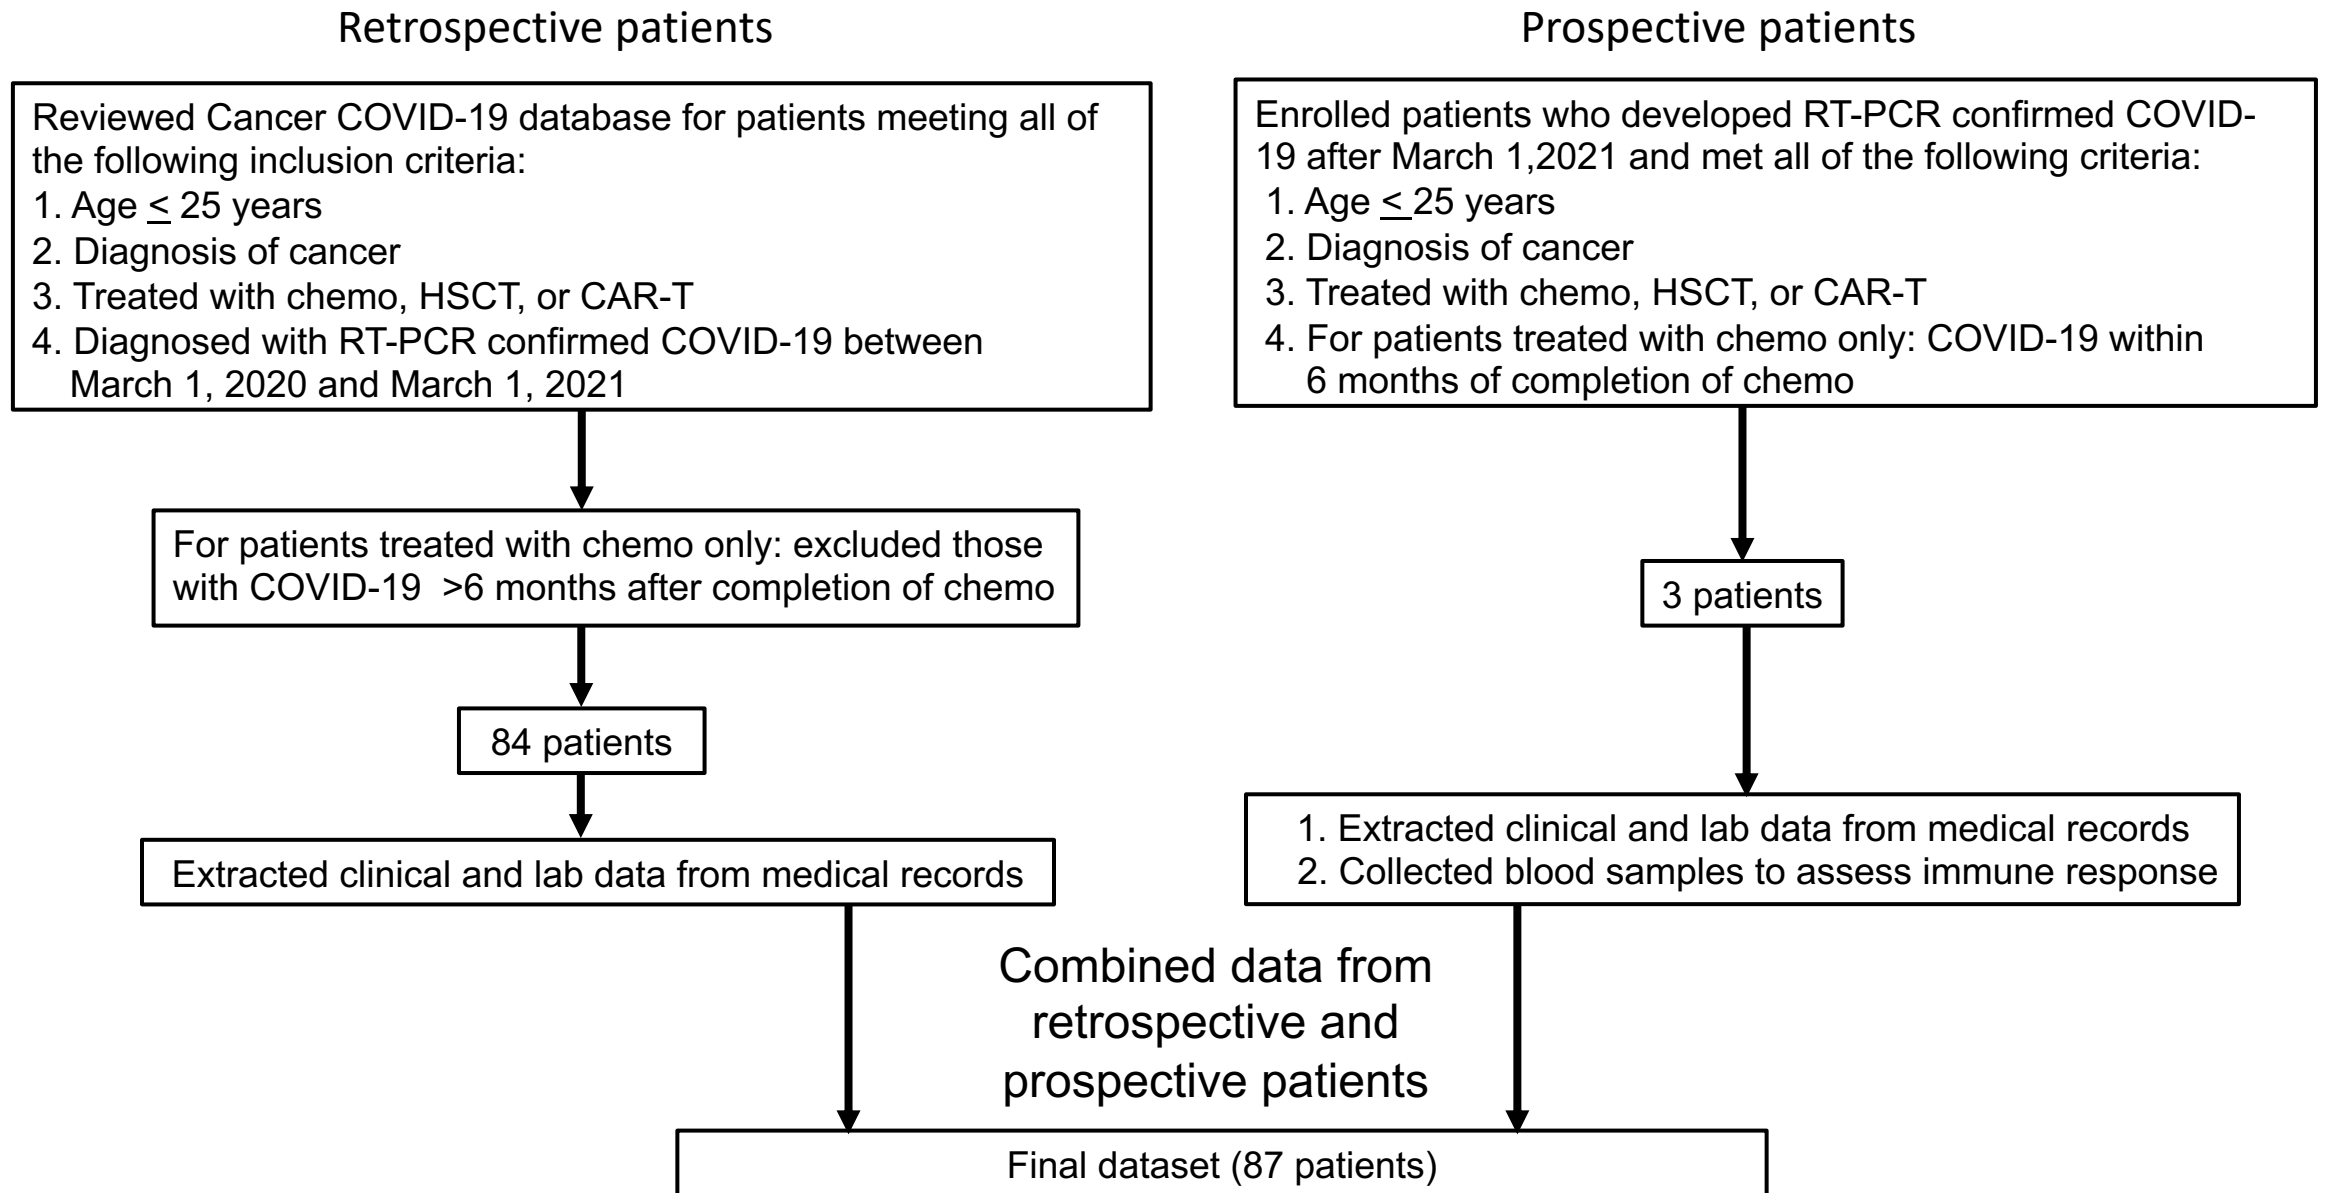

Figure S1. Study design for cancer cohort. Chemo: chemotherapy; HSCT: hematopoietic stem cell transplantation; CAR-T: chimeric antigen receptor T-cell therapy.

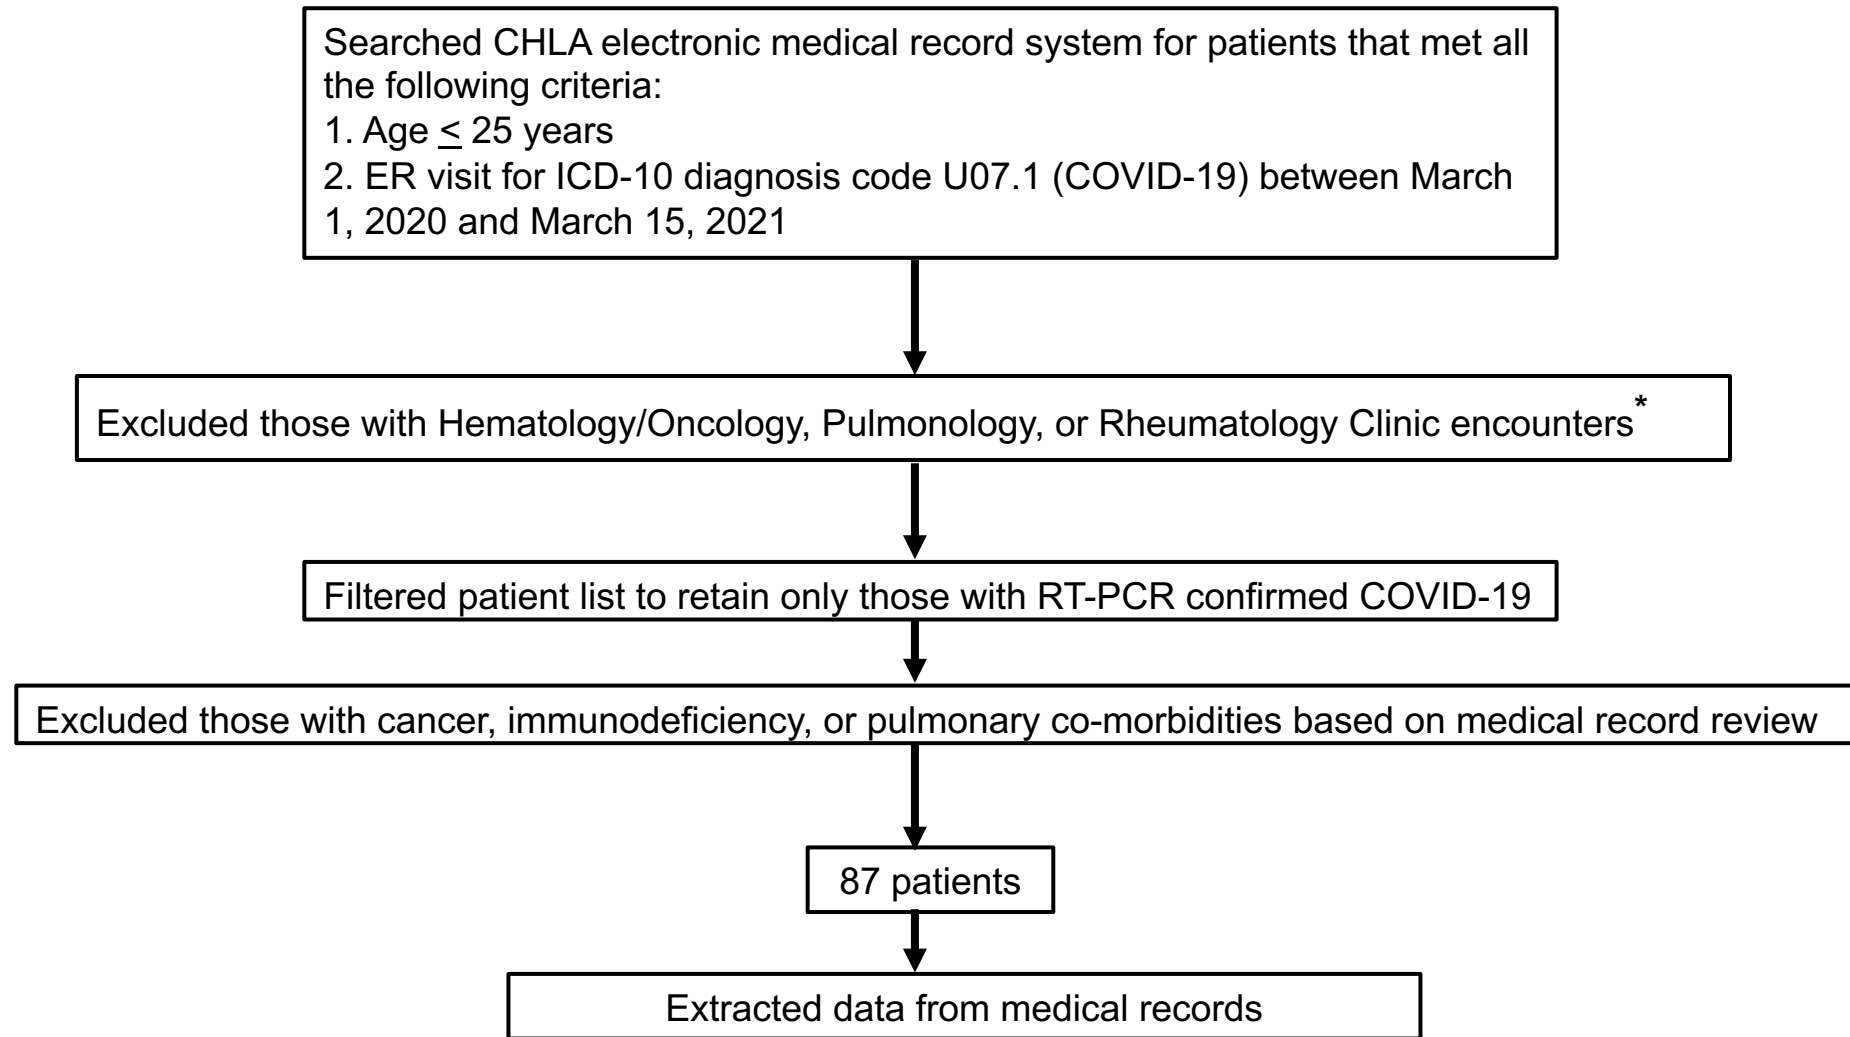

Figure S2. Study design for control cohort. \* This step represents a preliminary filter to exclude those with cancer, those on immunosuppressive medications, or those with pulmonary co-morbidities.
